# Supplementary material
Source: PubMed Central journal article supplement (PMC6647796)
Supplement: ao8b03222_si_001.pdf [file ao8b03222_si_001.pdf]

## Supporting Information

### Cobalt Phthalocyanine Sensitized Graphene-ZnO Composite: An Efficient NIR Active Photothermal Agent

Gururaj M. Neelgund<sup>†</sup> and Aderemi Oki<sup>\*,†</sup>

<sup>†</sup> Department of Chemistry, Prairie View A&M University, Prairie View, TX 77446, United States

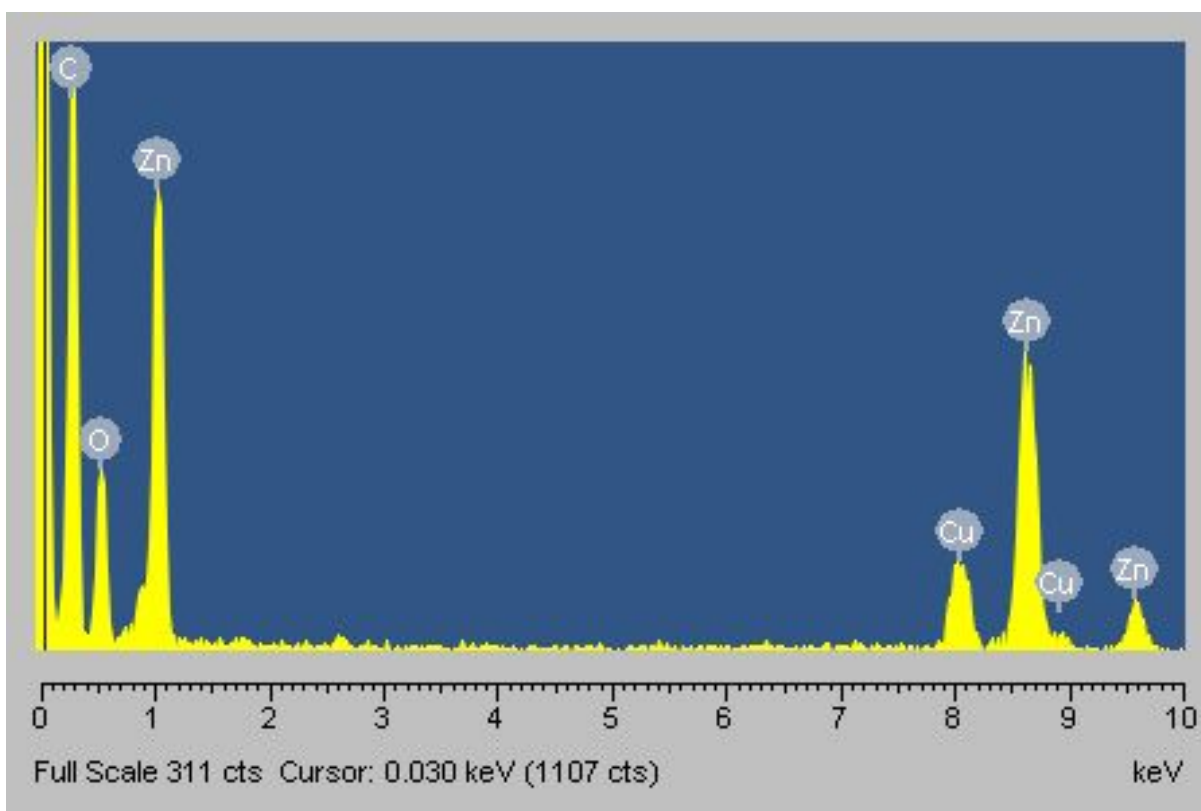

**Figure S1** EDS of GR-ZnO

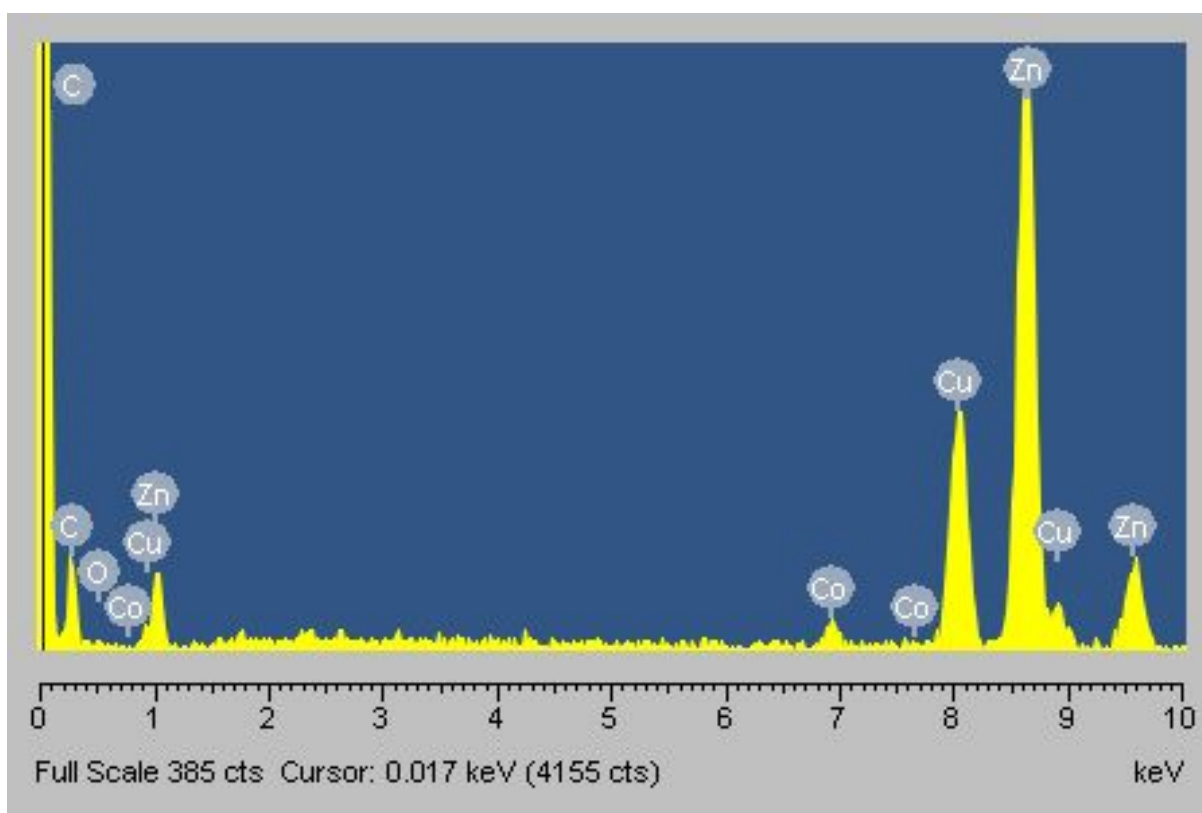

**Figure S2** EDS of GR-ZnO-CoPc

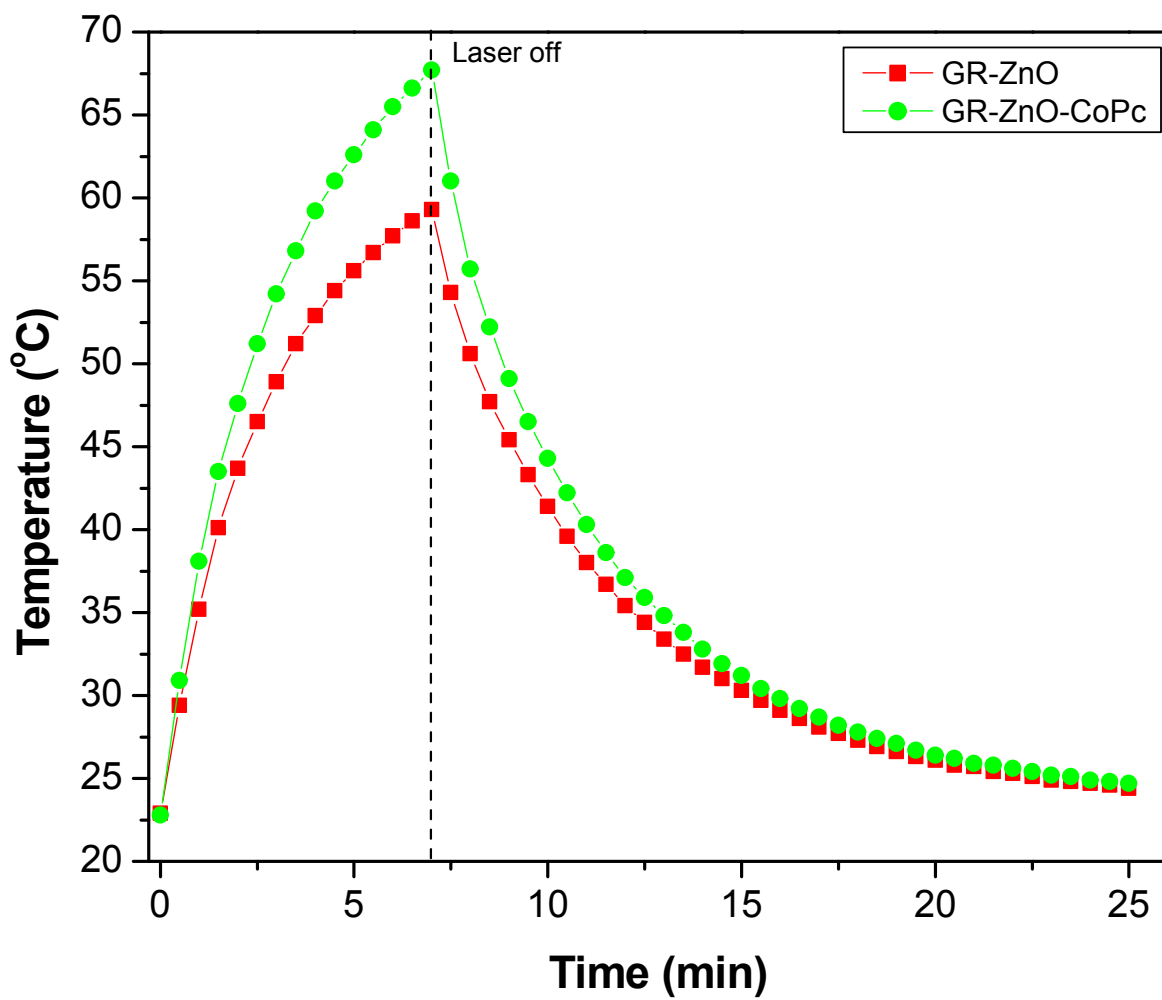

**Figure S3** Temperature variation found for aqueous dispersion of GR-ZnO and GR-ZnO-CoPc under exposure to 980 nm laser followed by its shut off.

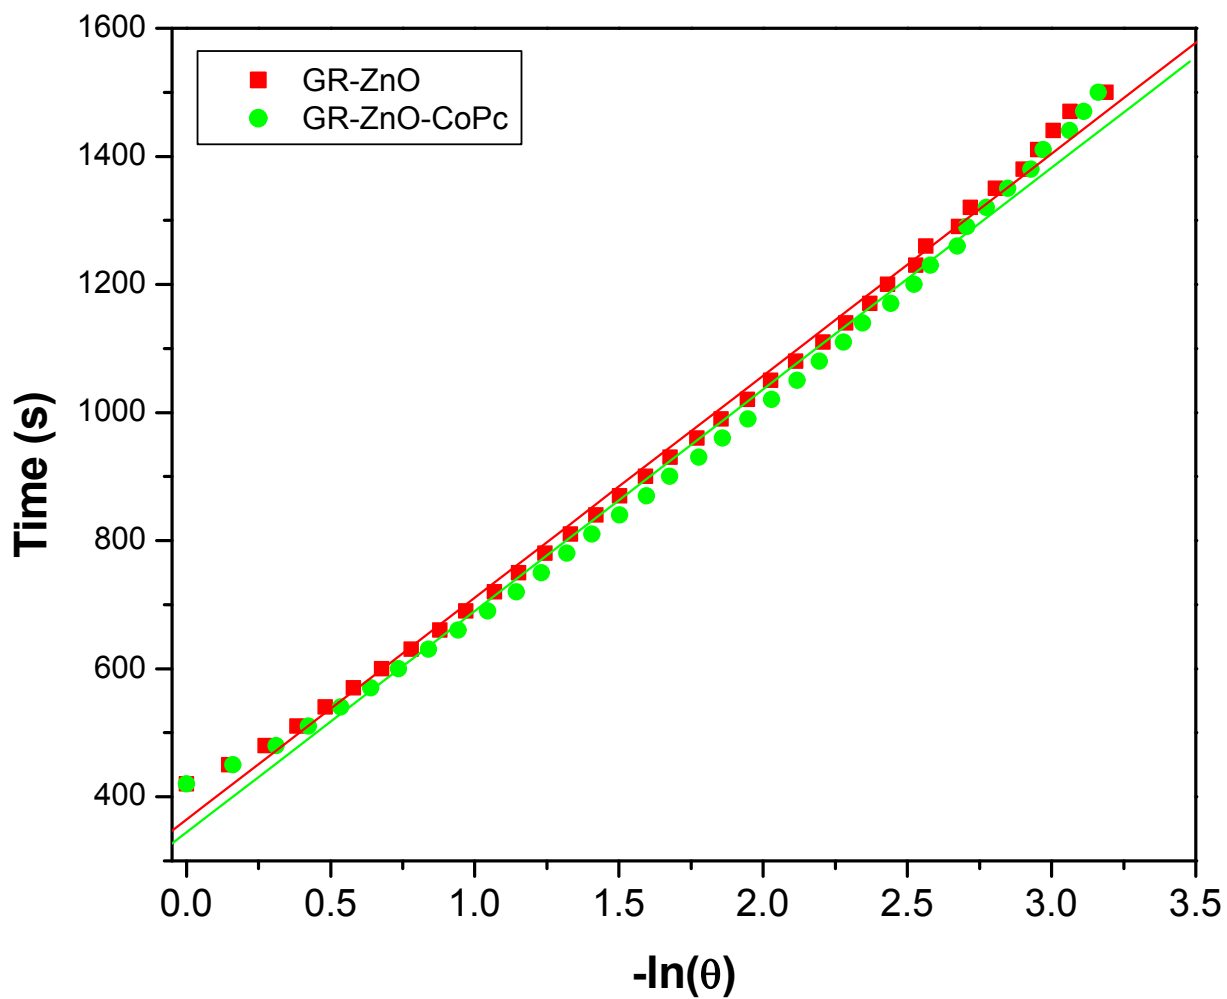

**Figure S4** The plot of time from cooling period versus negative natural logarithm of driving force temperature obtained for GR-ZnO and GR-ZnO-CoPc using the data shown in Figure S3.

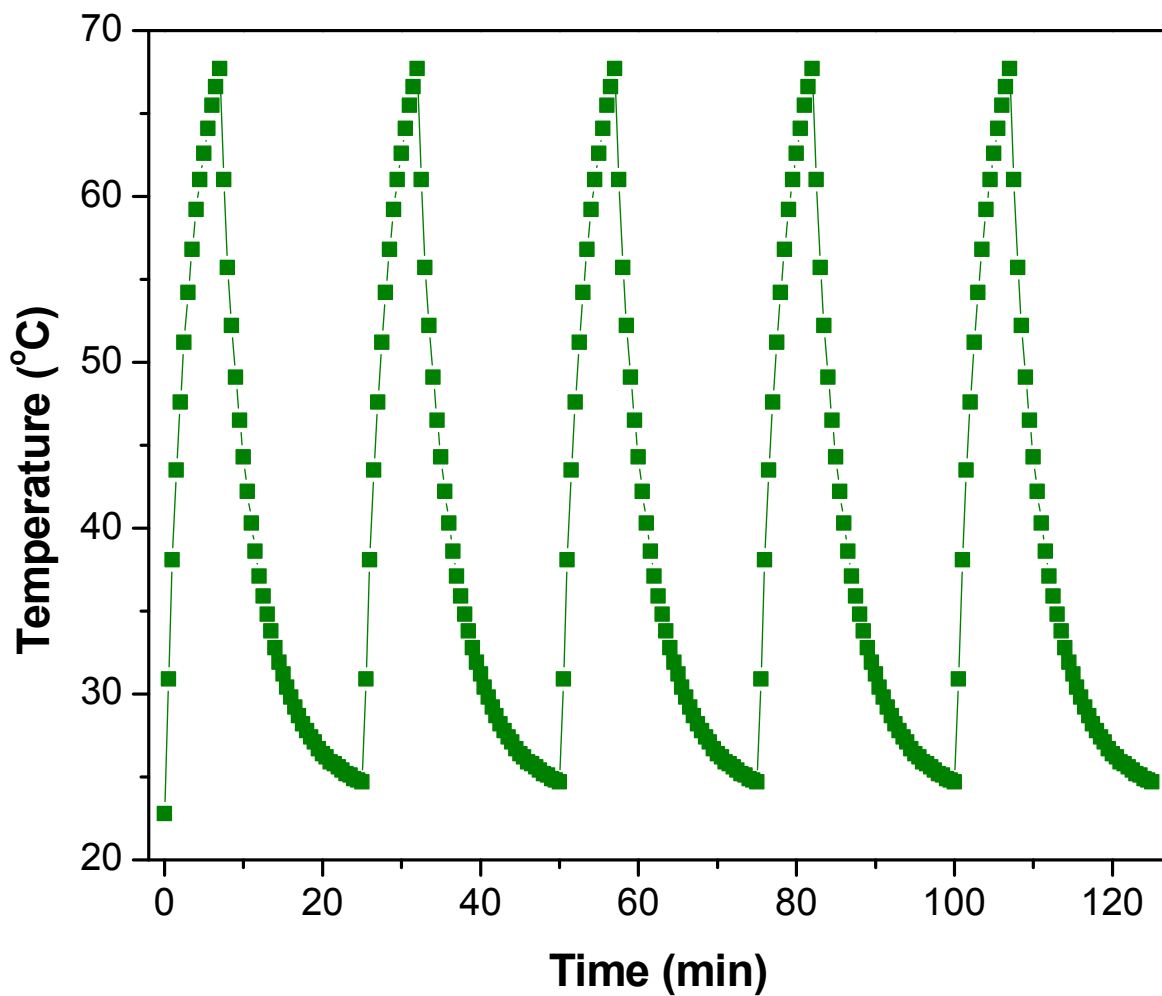

**Figure S5** Temperature variation measured for the aqueous dispersion of the GR-ZnO-CoPc for five cycles under irradiation by 980 nm laser.

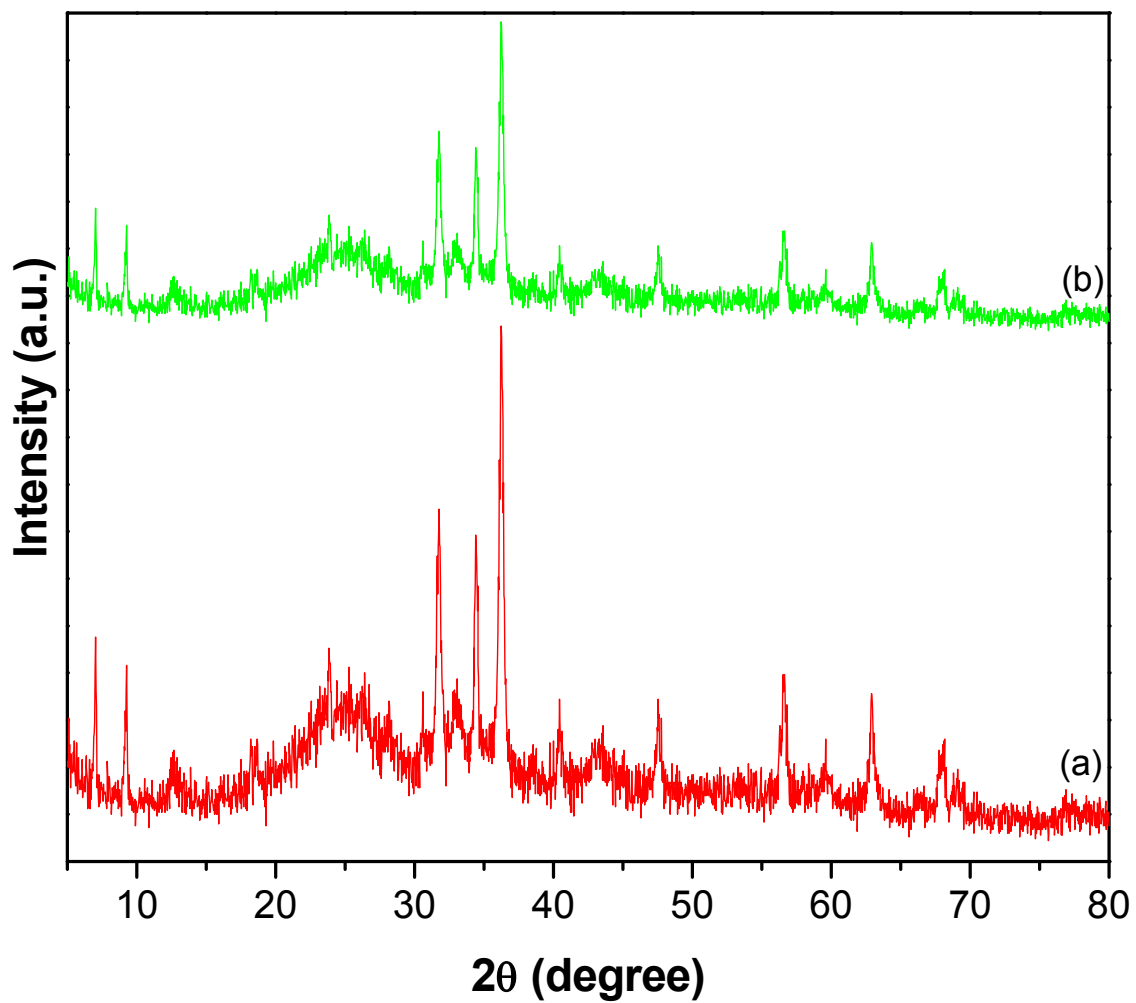

**Figure S6** XRD of GR-ZnO-CoPc recorded (a) before and (b) after using in five successive cycles of PTE measurement.

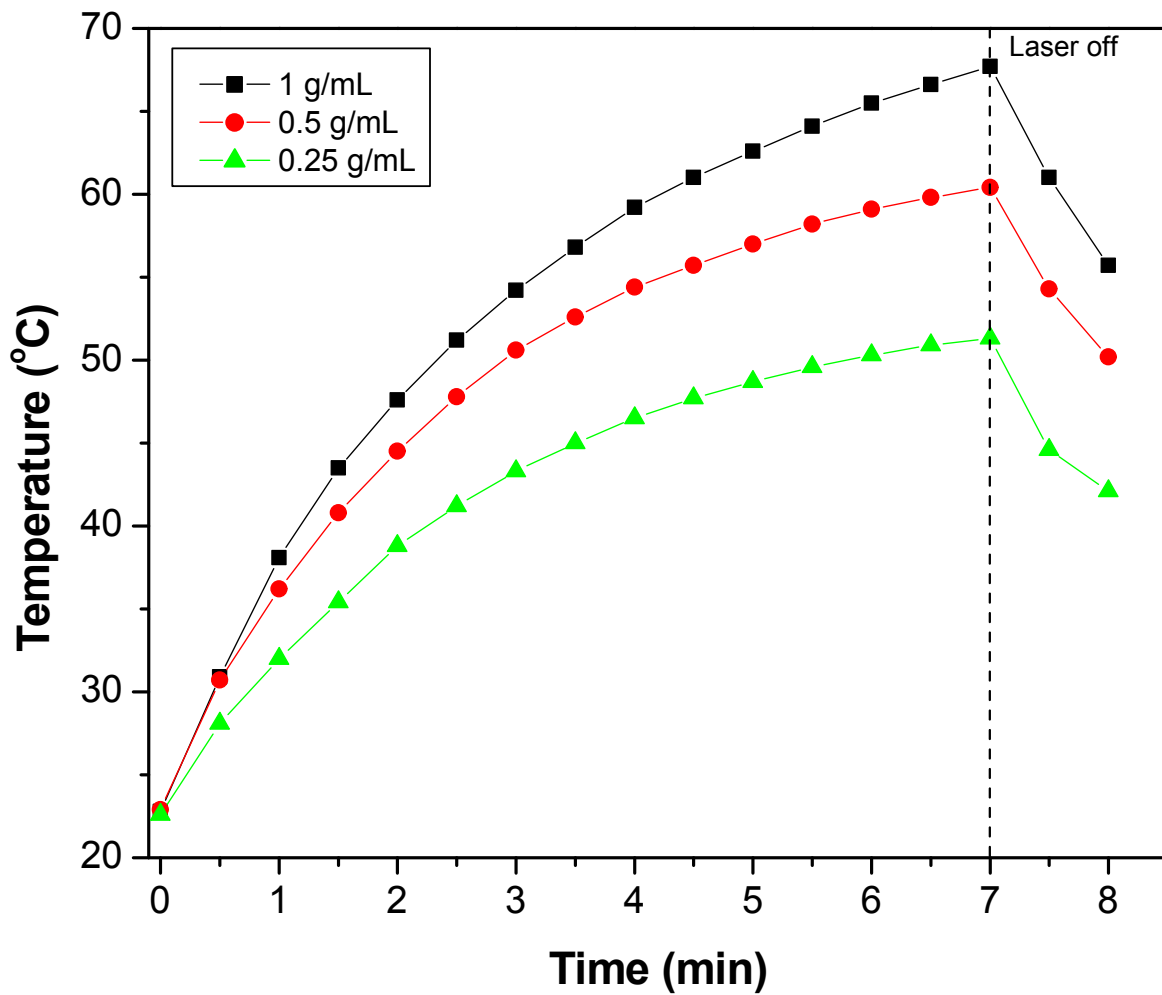

**Figure S7** Photothermal effect of GR-ZnO-CoPc measured at different concentrations.

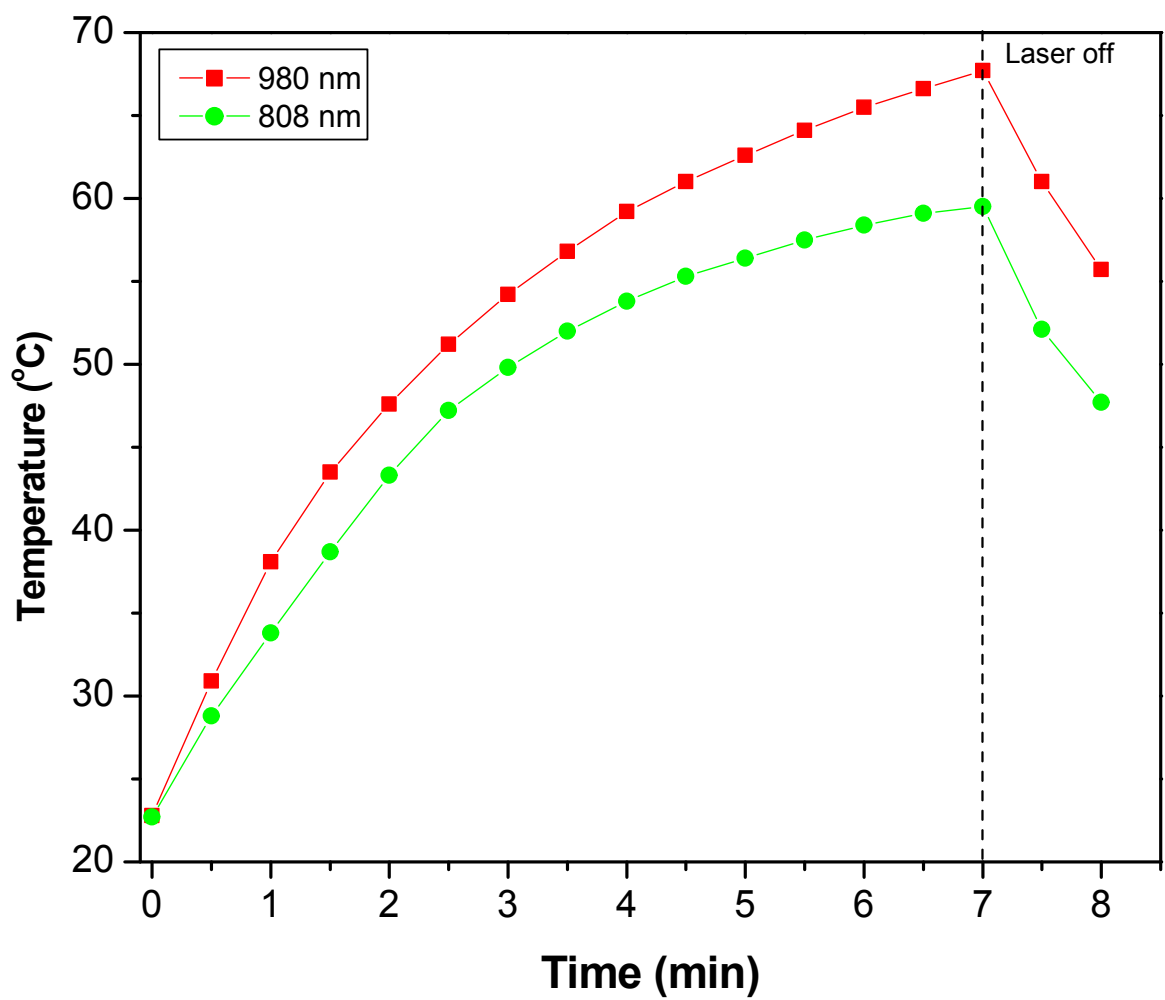

**Figure S8** Photothermal effect of GR-ZnO-CoPc measured under illumination of 980 and 808 nm laser systems.
